# Supplementary material
Source: publisher site journal article supplement (https://www.dovepress.com/article/336715)
Supplement: Supplementary file 1 [file get_supplementary_file.php]

## Supplementary Information

**Figure S1** Treatment protocol for FLT3-mutated AML unresponsive to venetoclax plus azacitidine.

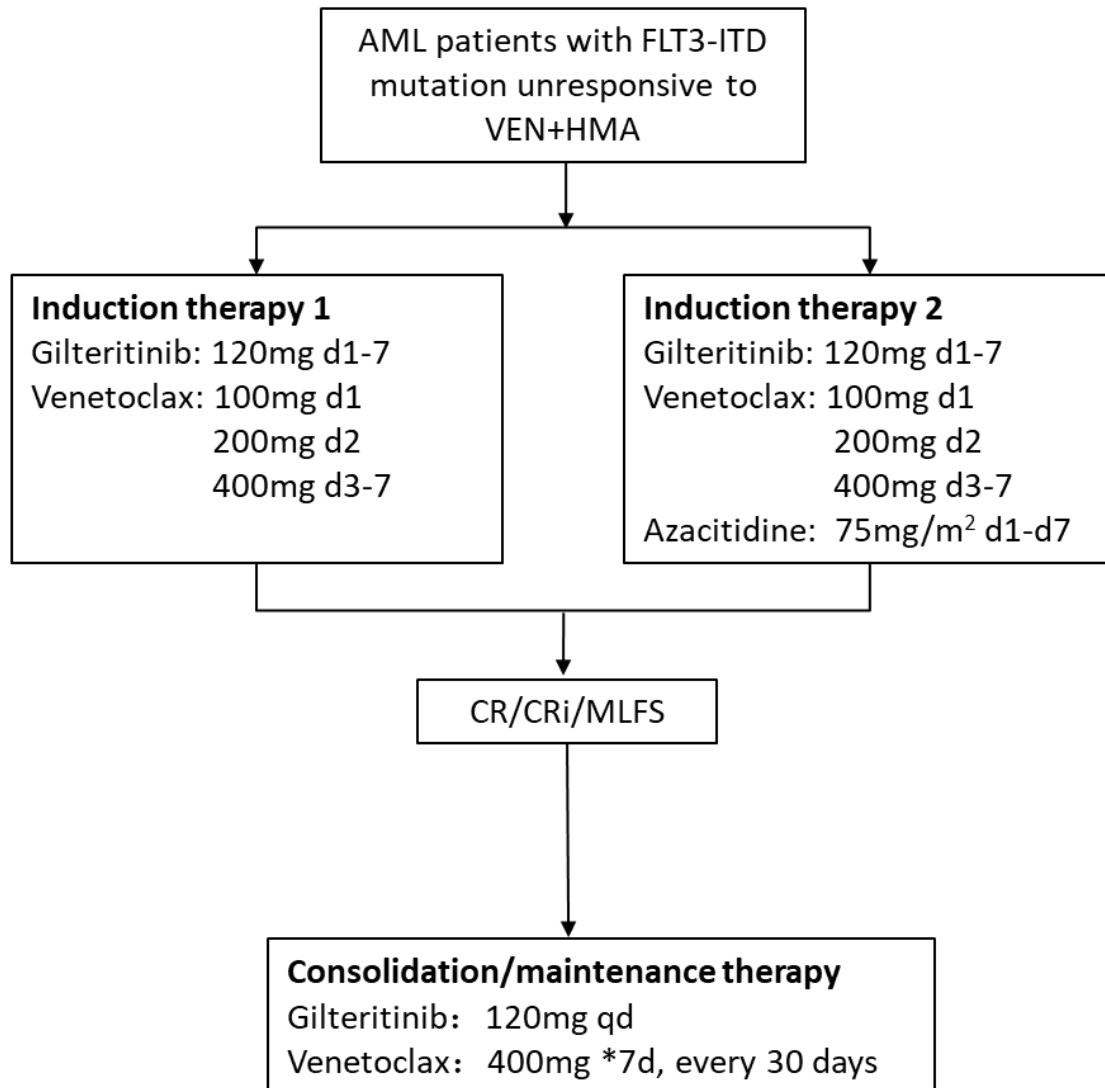

Abbreviations: HMA = hypomethylating agents, CR = Complete response, CRi = Complete response with incomplete haematologic recovery, MLFS = Morphologic leukaemia-free state
